# Supplementary material for: Association of EYS mutations with immune checkpoint inhibitor outcome and response in melanoma and non-small cell lung cancer
Source: Research Square preprint supplement (doi:10.21203/rs.3.rs-7648150/v1), 2025-10-12
Supplement: Supplementary file 1 [file 60e02e82f18e200fbb99247e.pdf]

## Supplementary Figures

# **Association of *EYS* mutations with immune checkpoint inhibitor outcome and response in melanoma and non-small cell lung cancer**

Xueying Wang<sup>1</sup>, Zhiyuan Wang<sup>1</sup>, Yixin Xu<sup>2</sup>, Wenjing Zhang<sup>1</sup>, Zhenpeng Li<sup>2</sup>, Qinghua Wang<sup>1\*</sup>, Dongyuan Sun<sup>3\*</sup>

<sup>1</sup>Department of Health Statistics, Key Laboratory of Medicine and Health of Shandong Province, School of Public Health, Shandong Second Medical University, Weifang, Shandong 261053, China.

<sup>2</sup>School of Medical Laboratory, Shandong Second Medical University, Weifang 261053, Shandong, China.

<sup>3</sup>Shandong Second Medical University, Weifang 261053, Shandong, China.

\*Correspondence: wangqinghua@sdsu.edu.cn(Q.W.);

13287869077@163.com(D.S.)

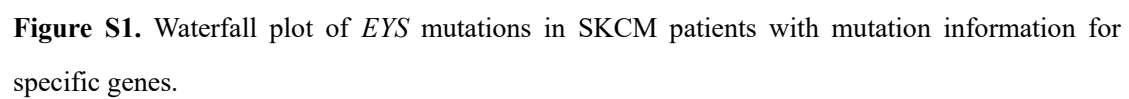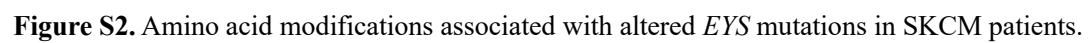

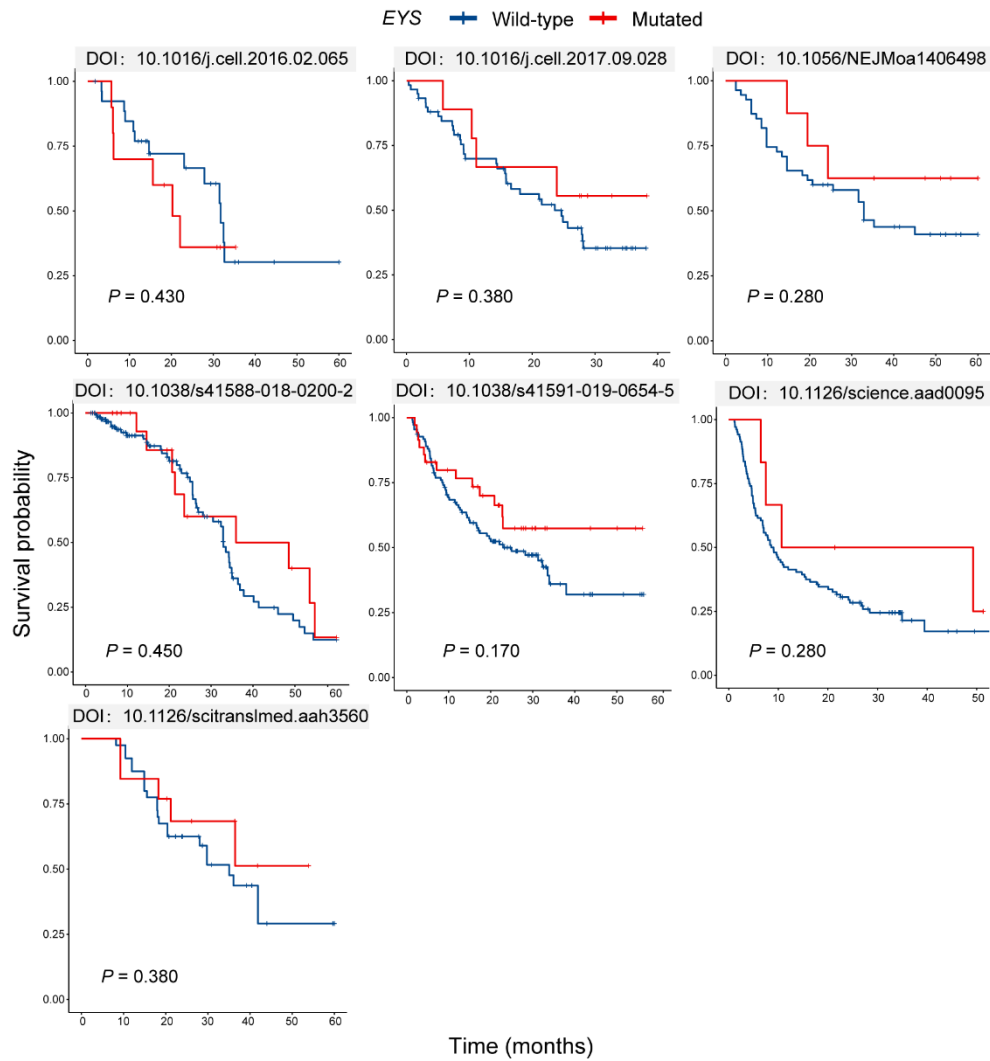

**Figure S3.** Survival predictive power of *EYS* mutations in a single SKCM cohort.

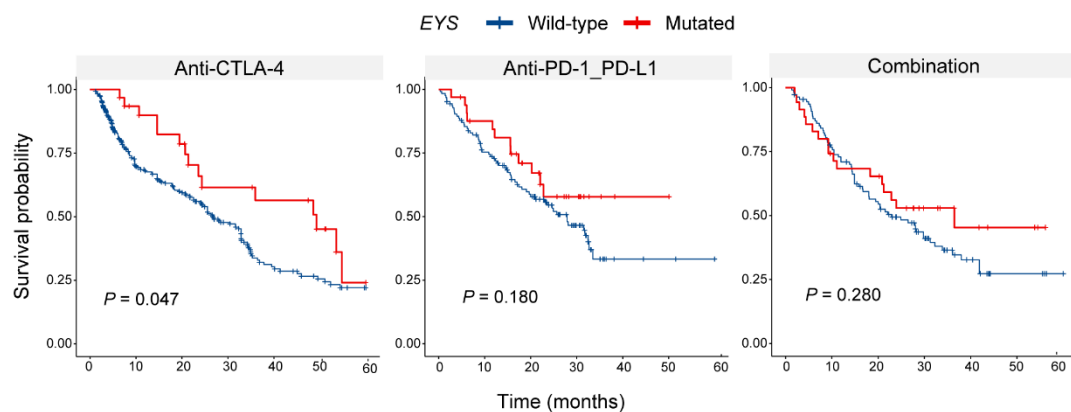

**Figure S4.** Survival predictive ability of *EYS* mutations in different SKCM ICI treatments.

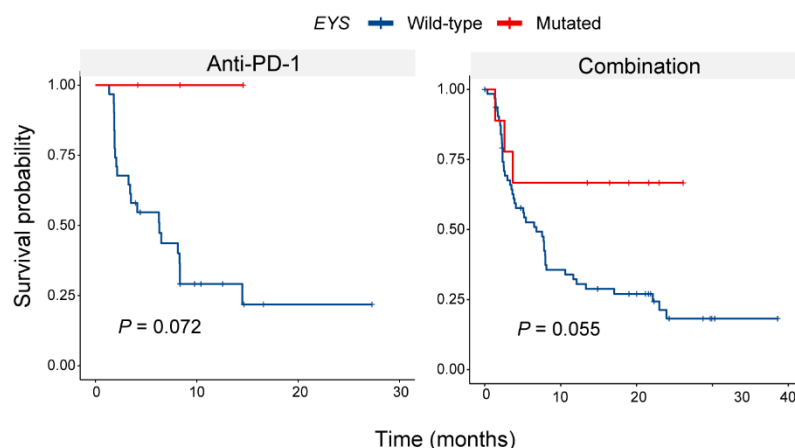

**Figure S5.** Survival predictive ability of *EYS* mutations in different NSCLC ICI treatments.

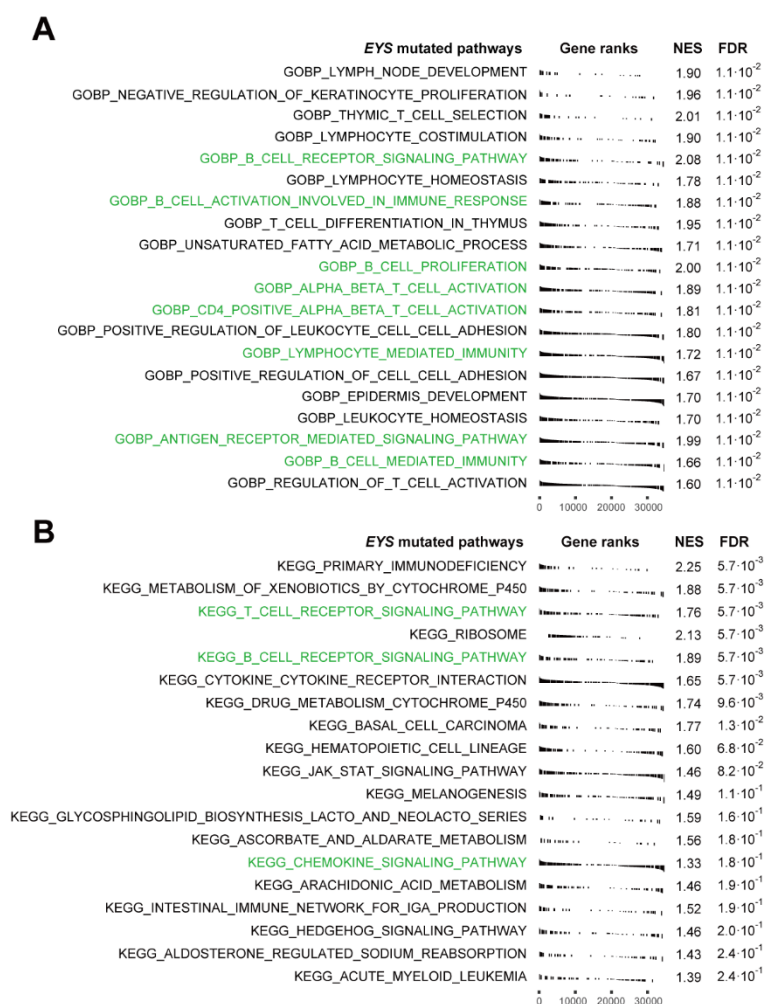

**Figure S6.** Pathway enrichment analysis results of GSEA in SKCM based on GO and KEGG gene sets in patients with *EYS* mutations.

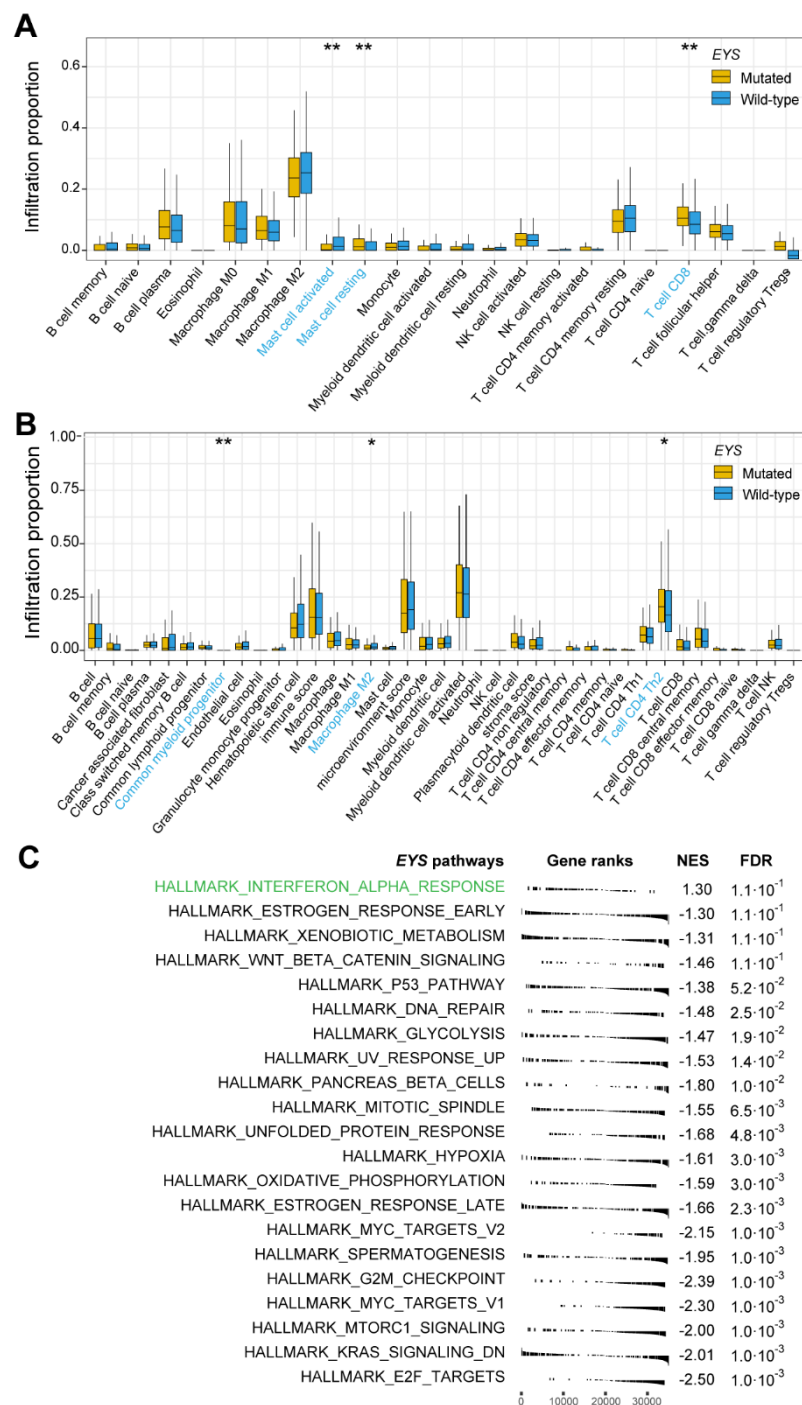

**Figure S7.** Immune infiltration and molecular pathways associated with *EYS* mutations in NSCLC. (A) Differences in the infiltration levels of 22 immune cells between *EYS*-mutant vs. wild-type patients based on the CIBERSORT algorithm, with significantly different immune cells highlighted in blue. (B) Differential enrichment scores of 64 immune/stromal cells in *EYS*-mutant vs. wild-type patients based on the xCell algorithm. (C) GSEA-based pathway enrichment analysis results of the two subgroups of *EYS* in NSCLC.

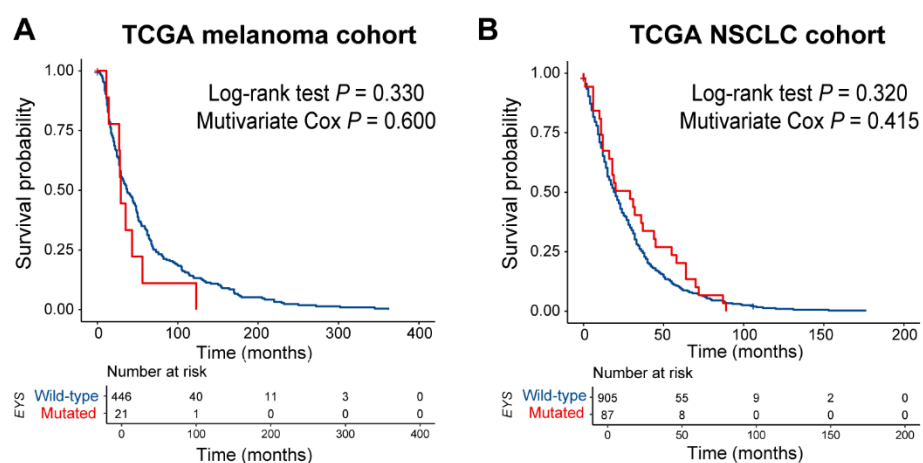

**Figure S8.** Survival predictive ability of *EYS* mutations in (A) SKCM and (B) NSCLC patients obtained from the TCGA cohort.
